# Supplementary material
Source: publisher figshare collection journal article supplement (https://gsajournals.figshare.com/ndownloader/files/21863118)
Supplement: Supplementary file 1 [file 21863118]

## Sheet: Sheet1
Table S1. Summary of RNA-Seq data from WW and DS samples
Cultivar	Sample IDa	Total reads	Mapped reads (%)	Uniquely mapped reads (%)	Concordant pairing aligned reads (%)	Mismatch rate per base (%)	Average mapped length
B73	RW11-1	42454470	0.9559	0.865	0.864833	0.001	195.44
	RW11-3	40393900	0.9432	0.8641	0.863926	0.0008	195.23
	DS10-1	57804950	0.9167	0.8237	0.823664	0.0012	197.59
	DS10-4	61491486	0.7912	0.6536	0.653453	0.0009	195.09
	DS11-1	44464680	0.9197	0.8157	0.815512	0.0009	195.35
	DS11-2	43218306	0.9113	0.8182	0.817995	0.0009	194.99
	DS3-3	61024308	0.9224	0.8082	0.808184	0.0011	197.7
	DS3-4	38844102	0.9459	0.8355	0.835308	0.001	194.36
	DS4-1	42594886	0.9497	0.8428	0.842643	0.001	195.2
	DS4-4	45163198	0.9313	0.8156	0.815409	0.0009	194.96
	DS5-2	52517278	0.9668	0.8732	0.872899	0.0015	193.53
	DS5-3	42159166	0.9485	0.8541	0.853947	0.0009	194.94
	DS6-1	53917572	0.9628	0.8785	0.878378	0.0013	195.34
	DS6-2	41617474	0.9485	0.8563	0.856095	0.0009	195.12
	DS7-2	65021638	0.9399	0.8543	0.854294	0.0013	197.48
	DS7-3	38906560	0.9551	0.8738	0.873649	0.001	194.69
	DS8-2	47831762	0.9177	0.823	0.822954	0.0013	197.45
	DS8-4	48961252	0.8945	0.7621	0.76199	0.001	194.93
	DS9-1	71564322	0.9355	0.8212	0.821203	0.0011	197.6
	DS9-3	50417790	0.9035	0.7702	0.770206	0.0013	197.34
	WW10-2	43389788	0.9593	0.8743	0.874162	0.0011	194.85
	WW10-3	51369292	0.9341	0.846	0.845966	0.0012	197.73
	WW3-3	42581452	0.945	0.8216	0.821422	0.001	194.49
	WW3-5	54345758	0.9531	0.8476	0.847461	0.0008	195.4
	WW4-3	42963616	0.9218	0.8196	0.8196	0.001	194.59
	WW4-4	42017180	0.9525	0.8397	0.839533	0.0009	195.5
	WW5-1	68818128	0.9219	0.7907	0.790665	0.0012	197.29
	WW5-3	41046484	0.9487	0.8555	0.855365	0.0008	195.61
	WW6-1	40958644	0.9457	0.856	0.855791	0.001	194.62
	WW6-2	47274142	0.9395	0.8345	0.83436	0.0008	195.26
	WW7-2	44219658	0.9313	0.855	0.854862	0.0009	195.16
	WW7-5	61346496	0.9536	0.8903	0.890155	0.0009	195.29
	WW8-1	74676530	0.9507	0.8909	0.890754	0.0009	195.21
	WW8-3	45085292	0.9514	0.8629	0.862763	0.0008	195.53
	WW9-2	46770628	0.9519	0.892	0.891854	0.0009	195.17
	WW9-3	43076104	0.94	0.8497	0.84953	0.0009	195.29
a DS: Drought Stress; WW: Well-Watered; RW: Re-watering
